# Supplementary material for: Comparative Efficacy of Multiple Therapies for the Treatment of Patients With Subthreshold Depression: A Systematic Review and Network Meta-Analysis
Source: Frontiers journal article supplement (doi:10.3389/fnbeh.2021.755547), 2021-10-08
Supplement: Data_Sheet_1.PDF [file Data_Sheet_1.PDF]

## *Supplementary Material*

### 1. Supplementary figure

**Supplementary Figure 1.** The risk of bias assessment graph of individual RCTs.

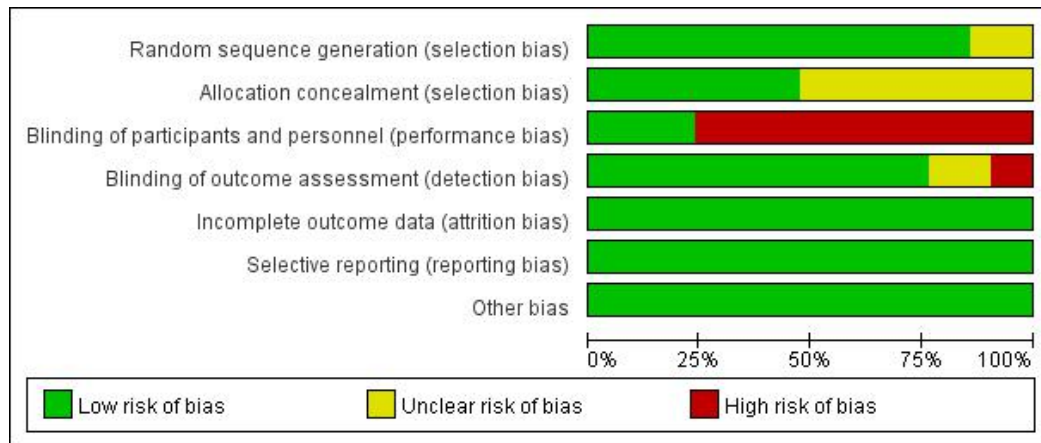

**Supplementary Figure 2.** Brooks Gelman Rubin diagnostic plots for model convergence with 10000 burn-ins and 50000 iterations of 4 each chain. (A) CES-D; (B) BDI; (C) PHQ-9; (D) K-6. Abbreviations: CES-D, Center for Epidemiologic Studies Depression scale; BDI, Beck Depression Inventory Scale; PHQ-9, the 9-item Patient Health Questionnaire; K6, Kessler Screening Scale for Psychological Distress.

**A**

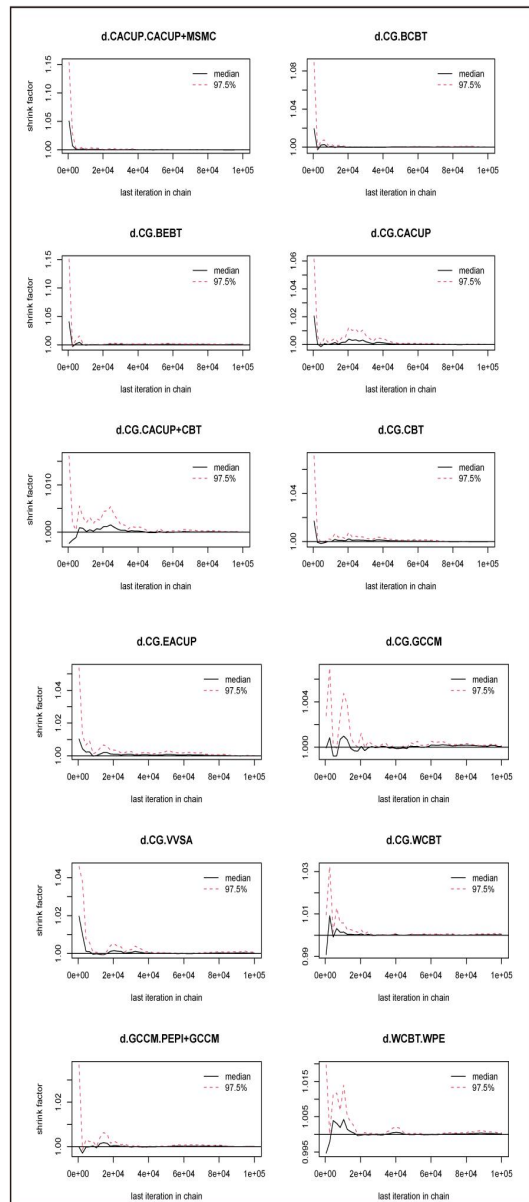

**B**

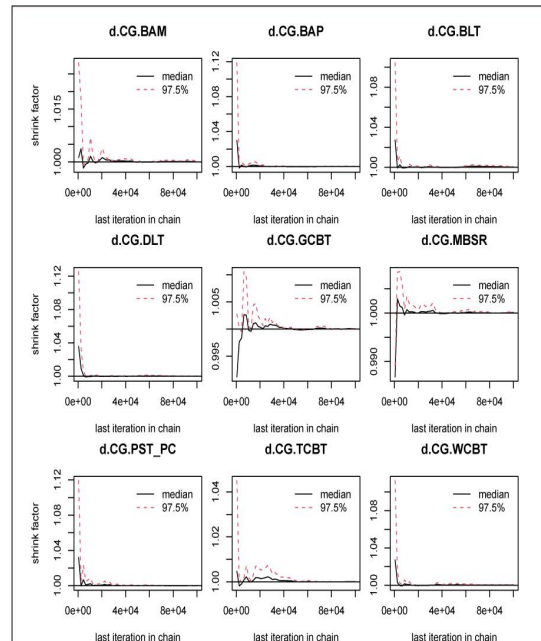

**C**

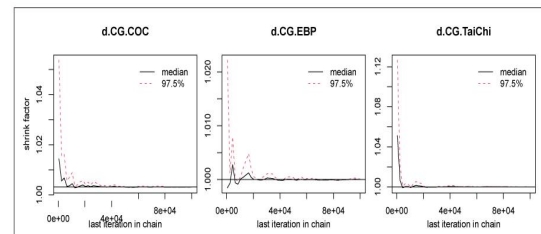

**D**

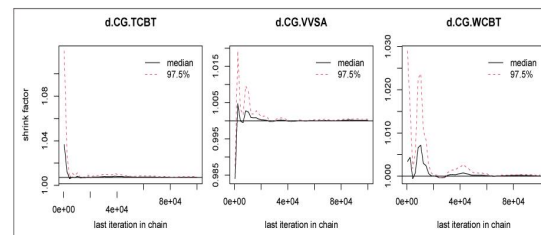

**Supplementary Figure 3.** Funnel plot for effect size and standard error of the included studies. (A) CES-D; (B) BDI; (C) PHQ-9; (D) K-6. Abbreviations: CES-D, Center for Epidemiologic Studies Depression Scale; BDI, Beck Depression Inventory Scale; PHQ-9, the 9-item Patient Health Questionnaire; K6, Kessler Screening Scale for Psychological Distress.

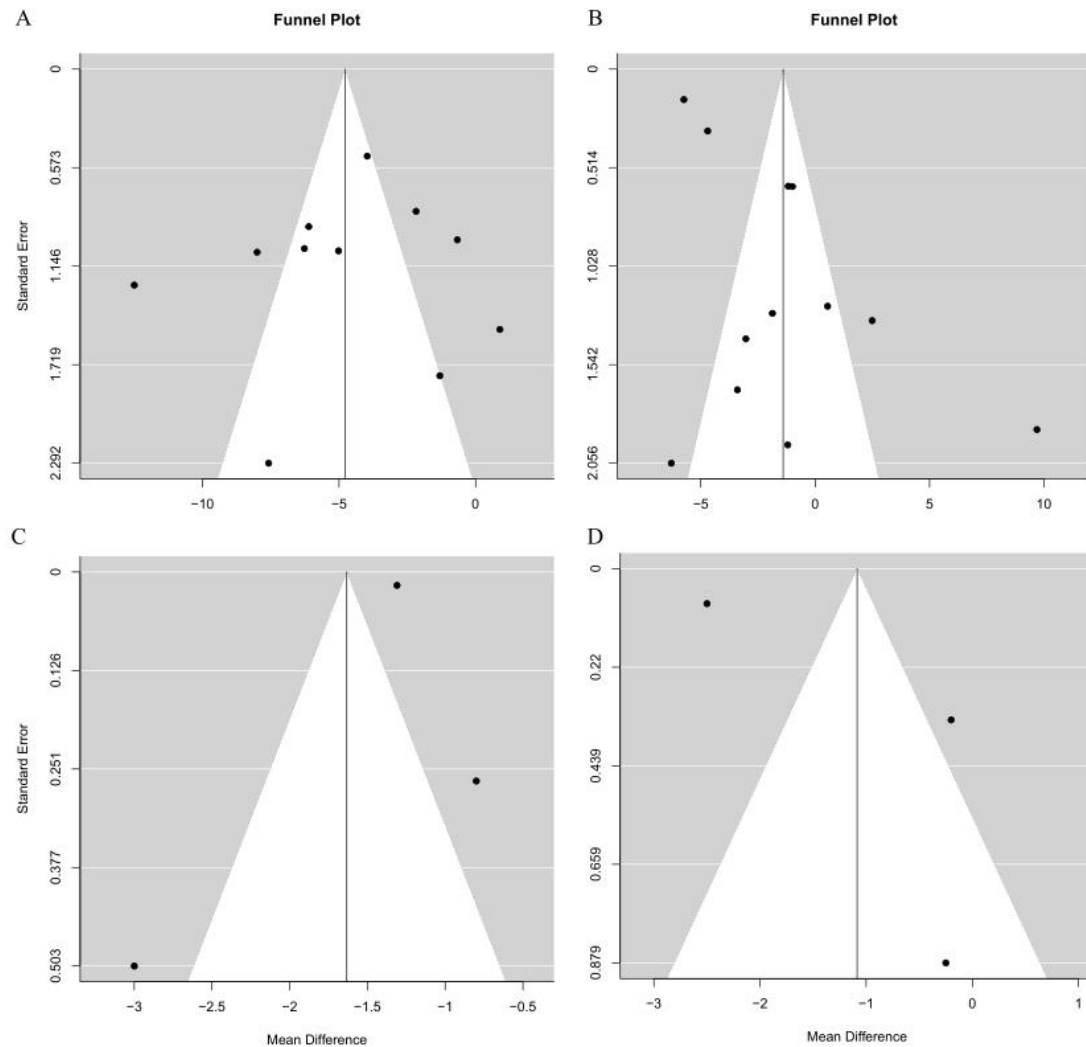

## 2. Supplementary table

**Supplementary Table 1.** Assessment of publication bias by Begg's and Egger's tests and model fit. Abbreviations: CES-D, Center for Epidemiologic Studies Depression Scale; BDI, Beck Depression Inventory Scale; PHQ-9, the 9-item Patient Health Questionnaire; K6, Kessler Screening Scale for Psychological Distress.

| Outcome | P-value      |             | Model fit      |             |
|---------|--------------|-------------|----------------|-------------|
|         | Egger's test | Begg's test | I <sup>2</sup> | data points |
| BDI     | 0.213        | 0.947       | 7              | 18          |
| CES     | 0.896        | 0.648       | 5              | 22          |
| K6      | 0.277        | 1.000       | 17             | 6           |
| PHQ     | 0.328        | 1.000       | 17             | 6           |
